# Supplementary material for: An R2R3-MYB Transcriptional Factor LuMYB314 Associated with the Loss of Petal Pigmentation in Flax (Linum usitatissimum L.)
Source: MDPI journal article supplement (doi:10.3390/genes15040511), 2024-04-18
Supplement: s1 [file s1]

# Supplementary Figures:

## An R2R3-MYB transcriptional factor *LuMYB314* associated with the loss of petal pigmentation in flax (*Linum usitatissimum* L.)

Dongliang Guo <sup>1</sup>, Haixia Jiang <sup>2</sup> and Liqiong Xie <sup>1\*</sup>

<sup>1</sup> Xinjiang Key Laboratory of Biological Resources and Genetic Engineering, College of Life Science and Technology, Xinjiang University, Urumqi 830017, China

<sup>2</sup> Key Laboratory of Plant Stress Biology in Arid Land, College of Life Science, Xinjiang Normal University, Urumqi 830017, China

\* Correspondence: picea@xju.edu.cn

|                |                                                                                  |     |
|----------------|----------------------------------------------------------------------------------|-----|
| CDC Bethune    | ATGGAATTAGAAGCAGGGTTACGGAGAGGAACATGGGGTGAAGAGGAGGATAGGCTGCTCCGGAGGTGCATTACACTTA  | 80  |
| Tammes Type 12 | ATGGAATTAGAAGCAGGGTTACGGAGAGGAACATGGGGTGAAGAGGAGGATAGGCTGCTCCGGAGGTGCATTACACTTA  | 80  |
| CDC Bethune    | TGGAGAAGGAAGATGGCATCTCGTTCGCCGCCGAGCAGGATTGAATAGATGCAGGAAAAGTTGTAGACTGAGGTGGCTGA | 160 |
| Tammes Type 12 | TGGAGAAGGAAGATGGCATCTCGTTCGCCGCCGAGCAGGATTGAATAGATGCAGGAAAAGTTGTAGACTGAGGTGGCTGA | 160 |
| CDC Bethune    | ATTACTTGAAGCCAAACATCAAAAGAGGAGAGTTTGAAGGAGCTGAAGTTGATCTACTCATTAGGTTGCACAAGCTTTTG | 240 |
| Tammes Type 12 | ATTACTTGAAGCCAAACATCAAAAGAGGAGAGTTTGAAGGAGCTGAAGTTGATCTACTCATTAGGTTGCACAAGCTTTTG | 240 |
| CDC Bethune    | GGTAACAGATGGTCGCTAATCGCCGGCGTTTGCCGGGAAGGACGGCCAACGACGTGAAAACTATTGGAACACCCACCA   | 320 |
| Tammes Type 12 | GGTAACAGATGGTCGCTAATCGCCGGCGTTTGCCGGGAAGGACGGCCAACGACGTGAAAACTATTGGAACACCCACCA   | 320 |
| CDC Bethune    | CAGGGAGAAGGAGAAGAAGAACTAACCACCATCACGACGTGCTCCTCCATGCCTGCGGCTGCGTTGACTTTTCCATGCA  | 400 |
| Tammes Type 12 | CAGGGAGAAGGAGAAGAAGAACTAACCACCATCACGACGTGCTCCTCCATGCCTGCGGCTGCGTTGACTTTTCCATGCA  | 400 |
| CDC Bethune    | AAAGACAGCGACATTGTACGGAACCACCGTGGTCATCGTGGAAAAAGGAAAGATAACAAAGACCAACATCATAAGACCG  | 480 |
| Tammes Type 12 | AAAGACAGCGACATTGTACGGAACCACCGTGGTCATCGTGGAAAAAGGAAAGATAACAAAGACCAACATCATAAGACCG  | 480 |
| CDC Bethune    | AGGCCTGTGGGCTTGCCCAAAGGATTCTGTTGGCGGGCCGAAACAAATAAGCAGGCCAGAGCCGATGTGTTGCTGCTGG  | 560 |
| Tammes Type 12 | AGGCCTGTGGGCTTGCCCAAAGGATTCTGTTGGCGGGCCGAAACAAATAAGCAGGCCAGAGCCGATGTGTTGCTGCTGG  | 560 |
| CDC Bethune    | TGATATTAACGGCGGCGGAAGTAGTACCGTTTGGGCACAAGAACTGAAGAGGTTTTTGGAGGATGACGTGGATAAATTCC | 640 |
| Tammes Type 12 | TGATATTAACGGCGGCGGAAGTAGTACCGTTTGGGCACAAGAACTGAAGAGGTTTTTGGAGGATGACGTGGATAAATTCC | 640 |
| CDC Bethune    | CAGCAGCCACCTGCAACAAAATGACAGAACATGATAATAGTAGTTGTAGTAATGATGAGATTATGAAGTTGGGTGTCGAG | 720 |
| Tammes Type 12 | CAGCAGCCACCTGCAACAAAATGACAGAACATGATAATAGTAGTTGTAGTAATGATGAGATTATGAAGTTGGGTGTCGAG | 720 |
| CDC Bethune    | GGTTTGACGATGTTTGACCGTCAGGAGGAAGGCAATCATCAAAGTTGTTGGGGGATGATGATGTAAGCATTGGGAGCT   | 800 |
| Tammes Type 12 | GGTTTGACGATGTTTGACCGTCAGGAGGAAGGCAATCATCAAAGTTGTTGGGGGATGATGATGTAAGCATTGGGAGCT   | 800 |
| CDC Bethune    | CCTTCAGCGATCATCTTGA                                                              | 819 |
| Tammes Type 12 | CCTTCAGCGATCATCTTGA                                                              | 819 |

**Figure S1.** Comparison of CDS sequences of *LuMYB314* between CDC Bethune (reference genome) and Tammes Type 12.

|                |                                                                                         |     |
|----------------|-----------------------------------------------------------------------------------------|-----|
| CDC Bethune    | MELEAGLRRTGWGEEEDRLLRRCI HTYGEGRWHL VP ARAGLNRCRKSCRLRWLNLYLKPNI KRGEFEGAEVDLLI RLHKLL  | 80  |
| Tammes Type 12 | MELEAGLRRTGWGEEEDRLLRRCI HTYGEGRWHL VP ARAGLNRCRKSCRLRWLNLYLKPNI KRGEFEGAEVDLLI RLHKLL  | 80  |
| CDC Bethune    | GNRWSLI AGRLPGRTANDVKNYWNTHHREKEKKKLTITI TTSSSMPAAALTFPCKRQRHCTEPPVVI VEKGKI TKTNI I RP | 160 |
| Tammes Type 12 | GNRWSLI AGRLPGRTANDVKNYWNTHHREKEKKKLTITI TTSSSMPAAALTFPCKRQRHCTEPPVVI VEKGKI TKTNI I RP | 160 |
| CDC Bethune    | RPVGLPKGFCWRAETNKQAQSRCVAAGDI NGGGSSTVWAQELKRFLEDDVDKFP AATCNKMTEHDNSSCSNDEI MKLGVE     | 240 |
| Tammes Type 12 | RPVGLPKGFCWRAETNKQAQSRCVAAGDI NGGGSSTVWAQELKRFLEDDVDKFP AATCNKMTEHDNSSCSNDEI MKLGVE     | 240 |
| CDC Bethune    | GLTMFDRQEEGNHQS CWGDDDDVSI WELLQRS S                                                    | 272 |
| Tammes Type 12 | GLTMFDRQEEGNHQS CWGDDDDVSI WELLQRS S                                                    | 272 |

**Figure S2.** Comparison of amino acid sequences of LuMYB314 between CDC Bethune (reference genome) and Tammes Type 12.

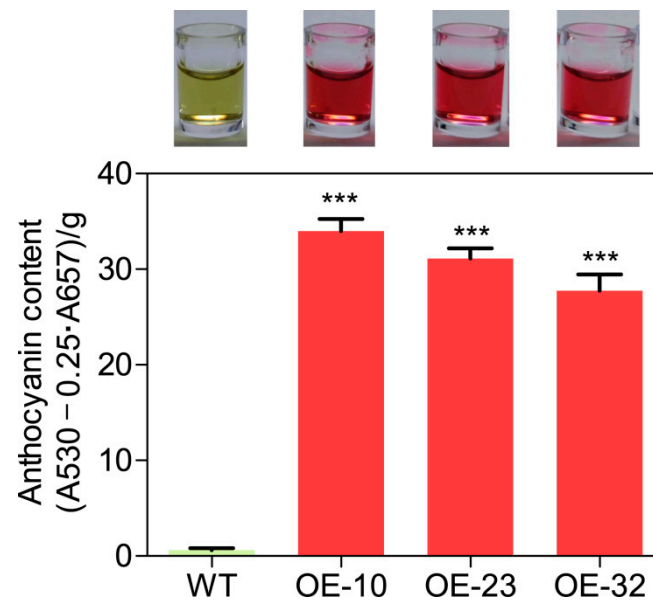

**Figure S3.** Total anthocyanin contents in *Arabidopsis* seedlings of WT and three independent 35S:LuMYB314<sup>Col-0</sup> transgenic lines. Asterisks indicate significant differences to the wild-type Col-0 (Student's *t*-test, \*\*\**P* < 0.001; values are means ± SD (*n* = 3)).
