# Supplementary material for: An R2R3-MYB Transcriptional Factor LuMYB314 Associated with the Loss of Petal Pigmentation in Flax (Linum usitatissimum L.)
Source: MDPI journal article supplement (doi:10.3390/genes15040511), 2024-04-18
Supplement: s1 [file s1]

| Table S1. The list of primers used in this study.         |                                 |                                |
|-----------------------------------------------------------|---------------------------------|--------------------------------|
| Name                                                      | Forward primer (5'-3')          | Reverse primer (5'-3')         |
| <i>LulMYB314</i> for overexpression vector                | GGGGTACCATGGAATTAGAAGCAGGGTTACG | GCTCTAGATTAAGATGATCGCTGAAGGAGC |
| Enzyme cleavage sites and guard bases are marked in blue. |                                 |                                |
